# Supplementary material for: Molecular chaperones in stroke-induced immunosuppression
Source: PubMed Central journal article supplement — Neural Regen Res. 2023 May 12;18(12):2638–44. doi: 10.4103/1673-5374.373678 (PMC10358675; doi:10.4103/1673-5374.373678), 2023-05-12
Supplement: NRR-18-2638_Suppl1.pdf [file NRR-18-2638_Suppl1.pdf]

## OPEN PEER REVIEW REPORT 1

**Name of journal:** Neural Regeneration Research

**Manuscript NO:** NRR-D-22-01070

**Title:** Molecular Chaperones in Stroke-Induced Immunosuppression

**Reviewer's Name:** Alejandro Bustamante

**Reviewer's country:** Spain

### COMMENTS TO AUTHORS

The present manuscript aimed at reviewing the available evidence of the role of molecular chaperones in stroke-induced immunosuppression (SIIS), a condition responsible for one of the major complications after stroke, namely infections. My main concern is that the manuscript focuses mainly in the role of molecular chaperones on ischemic brain damage and how these molecules might be neuroprotective. From here, with a few exceptions, most of the associations between molecular chaperones and SIIS presented here are rather speculative (as an example: "Another fact is that HSP70 in the peripheral serum increases during stroke, so HSP70 in the peripheral serum may also have an effect on SIIS"). While this limitation is basically due to a gap in literature and not to a bad review process, it questions the interest of the reported work.
